# Supplementary figures and images for: Addressing the disproportionate breast cancer burden in LMICs: Outcomes from an interventional study evaluating preventing teachings in high schools
Source: Research Square preprint supplement (doi:10.21203/rs.3.rs-3101943/v1), 2023-08-29

**APPENDIX 1**

**ENDORSEMENT LETTER FROM THE HARVARD MEDICAL**

*
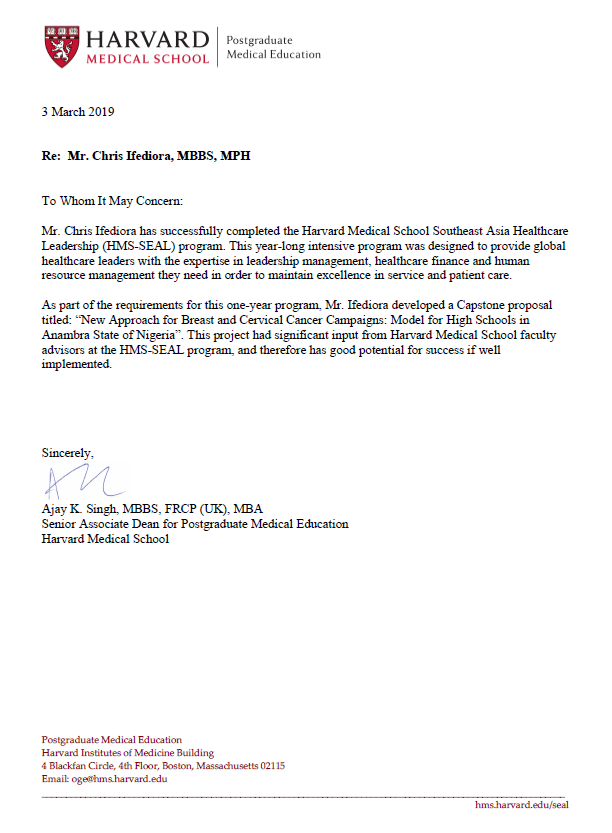
*

Supplement: Supplementary file 1 [file a3b2c91ed49e44271af15d4f.docx]
